# Supplementary material for: Food types, preparation methods, and use of high-sodium seasonings in chain restaurants in Jamaica – Implications for Sodium Consumption and Food Policy
Source: Research Square preprint supplement (doi:10.21203/rs.3.rs-7228602/v1), 2025-08-05
Supplement: Supplementary file 1 [file 401f40dc6b1e8e988c520b80.docx]

**Appendix** - Food types, preparation methods, and use of high-sodium seasonings in chain restaurants in Jamaica – Implications for Sodium Consumption and Food Policy

**Authors:** Sherene T McNeil1, Evelyn Walker1, Suzanne Soares-Wynter2, Nadia R. Bennett1, Karen Webster-Kerr3, Marshall K Tulloch-Reid1, Tamu Davidson3, Andriene Grant3, Joette McKenzie1, Alphanso Blake4, Simon G Anderson5, Simone Spence3, Novie Younger-Coleman1, Trevor S Ferguson1

**Institutions:**

1Epidemiology Research Unit, Caribbean Institute for Health Research, The University of the West Indies, Mona, Kingston 7, Jamaica.

2Tropical Metabolism Research Unit, Caribbean Institute for Health Research, The University of the West Indies, Mona, Kingston 7, Jamaica.

3Ministry of Health and Wellness, Kingston 5, Jamaica.

4School of Clinical Medicine and Research, The Faculty of Medical Sciences, The University of the West Indies, Nassau, The Bahamas.

5George Alleyne Chronic Disease Research Centre, Caribbean Institute for Health Research, The University of the West Indies, Cave Hill, Bridgetown, St. Michael. BB11115, Barbados.

Corresponding author

Professor Trevor S. Ferguson

Epidemiology Research Unit 
Caribbean Institute for Health Research 
University of the West Indies, Mona 
Kingston 7, Jamaica

Email: [*trevor.ferguson@uwi.edu*](mailto:trevor.ferguson@uwi.edu), [trevor.ferguson02@gmail.com](mailto:trevor.ferguson02@gmail.com)

Tel: 876-9272471; Fax: 876-9272984 

**Appendix**

**Table S1: Restaurant Profile**

| **Restaurant** | **Food Establishment Type** | **Electronic Menu Supplied** | **Nutrition Profile Available** |
| --- | --- | --- | --- |
| Restaurant 1 | Fast Food | Yes | No |
| Restaurant 2 | Full Service | Yes | No |
| Restaurant 3 | Fast Food | Yes | No |
| Restaurant 4 | Fast Food | No | Yes |
| Restaurant 5 | Fast food | Yes | Yes |
| Restaurant 6 | Full Service | Yes | Yes |
| Restaurant 7 | Fast Casual Dining | No | No |

**Table S2. Use of Salts, Seasonings, Sauces and Spices by Food Categories**

| **Salt/ Seasonings/ Sauces/ Spices** | **Meat/ chicken/ Fish/ Seafood**  **n (%)** | **Starch-based foods (flour, bread, rice)**  **n (%)** | **Soup**  **n (%)** | **Other (Vegetarian, pasta, Patty)**  **n (%)** |
| --- | --- | --- | --- | --- |
| Table salt | 6 (9.8) | 5 (31.3) | 2 (20) | 6 (30) |
| Sea Salt * | 29 (47.5) | 1 (6.3) | 4 (40) | 6 (30) |
| MSG | 10 (16.4) | 0 (0) | 0 (0) | 0 (0) |
| Baking Powder | 2 (3.3) | 3 (18.8) | 0 (0) | 0 (0) |
| Baking Soda | 1 (1.6) | 2 (12.5) | 0 (0) | 0 (0) |
| Ketchup ** | 17 (27.9) | 0 (0) | 0 (0) | 0 (0) |
| Barbeque Sauce | 2 (3.3) | 0 (0) | 0 (0) | 1(5) |
| Soy Sauce ** | 18 (29.5) | 0 (0) | 0 (0) | 0 (0) |
| Jerk Seasoning Marinade ** | 15 (24.6) | 0 (0) | 0 (0) | 0 (0) |
| Powdered Jerk Seasoning * | 15 (24.6) | 1 (6.3) | 0 (0) | 0 (0) |
| Garlic Salt | 4 (6.6) | 0 (0) | 0 (0) | 3 (15) |
| Onion Powder* | 4 (6.6) | 0 (0) | 0 (0) | 5 (25) |
| Bouillon | 1 (1.6) | 0 (0) | 0 (0) | 0 (0) |

*p<0.05; **p<0.01; ***p<0.001

**Table S3: Availability of Low Salt Options and Steps to Reduce Salt Use**

| **Restaurant** | **Food Establishment Type** | **Low Salt Options** | **Steps to reduce Salt** |
| --- | --- | --- | --- |
| Restaurant 1 | Fast Food | Yes | Depends on the portion of the item |
| Restaurant 2 | Full Service | Yes | Low sodium freshly prepared done to order (e.g., no salt). based on natural seasoning used. Customer request |
| Restaurant 3 | Fast Food | No | N/A |
| Restaurant 4 | Fast Food | Yes | The use of natural seasoning |
| Restaurant 5 | Quick Service | No | Natural seasoning used; portion control of salt added to batches hence proprietary prepared |
| Restaurant 6 | Full Service | Yes | Low sodium products |
| Restaurant 7 | Fast Food | Yes | Natural seasoning |
